# Supplementary material for: Deep Sequencing and Ecological Characterization of Gut Microbial Communities of Diverse Bumble Bee Species
Source: PubMed Central journal article supplement (PMC4359114; doi:10.1371/journal.pone.0118566), 2015-03-13
Supplement: pone.0118566.s005.pdf [file pone.0118566.s005.pdf]

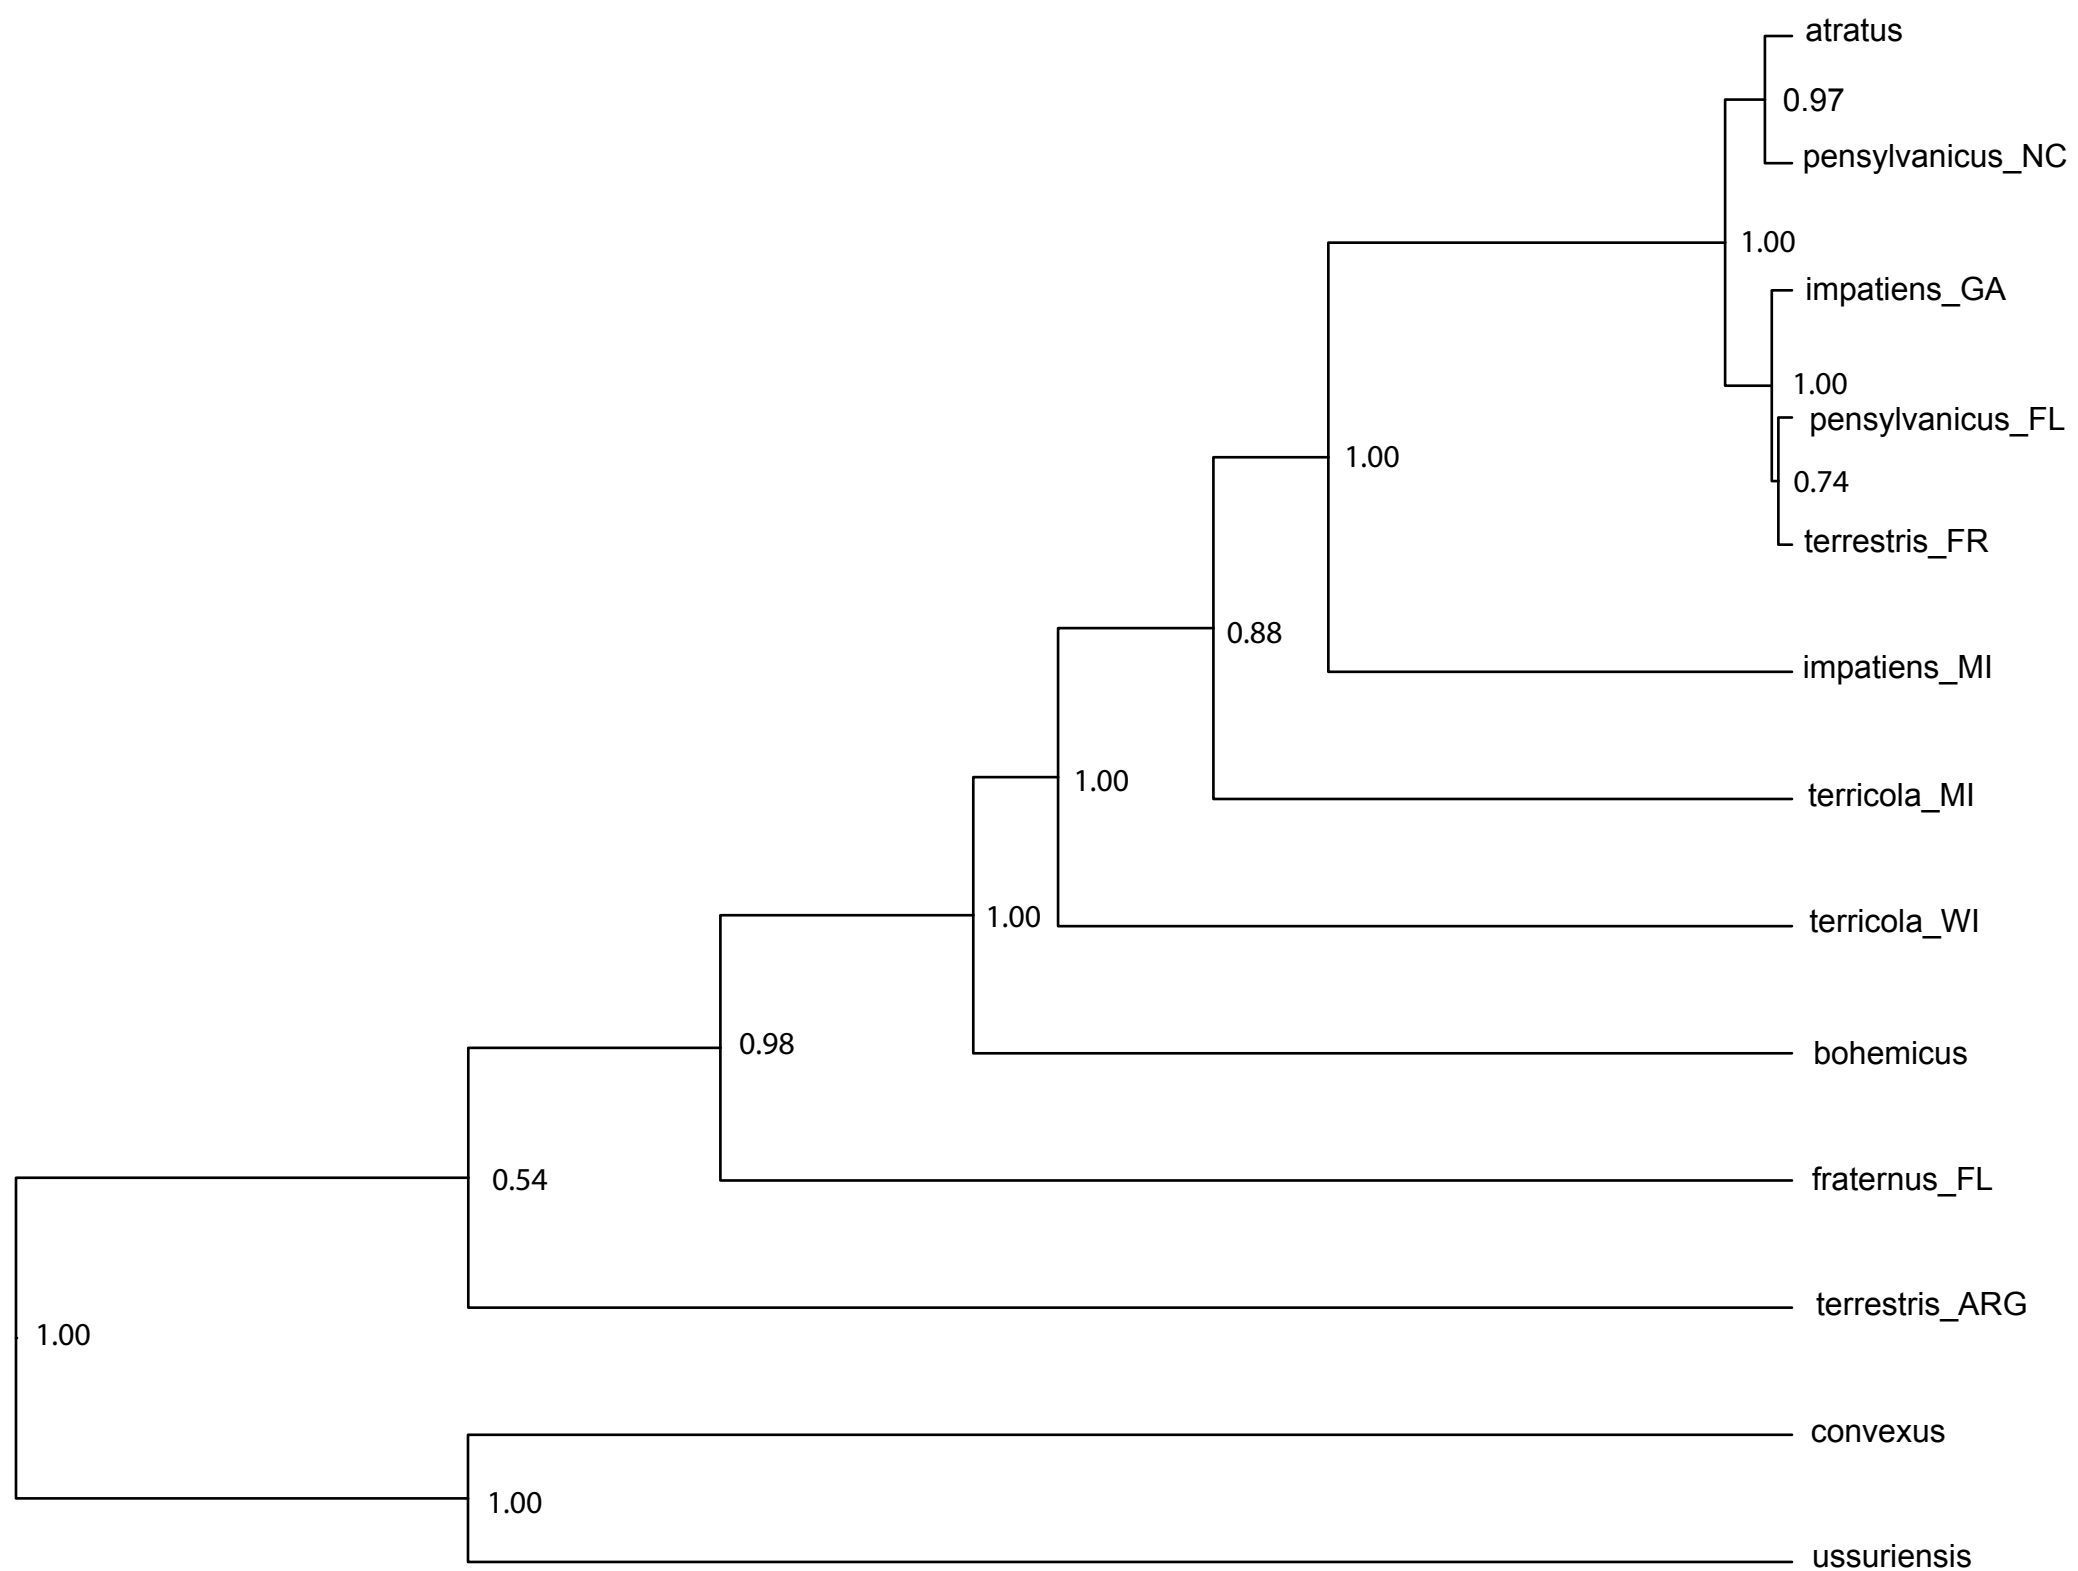

0.05
